# Supplementary material for: Fingerprinting of hydroxyl radical-attacked polysaccharides by N-isopropyl-2-aminoacridone labelling
Source: PubMed Central journal article supplement (PMC4170706; doi:10.1042/bj20140678), 2014-09-22
Supplement: bj4630225add.pdf [file bj4630225add.pdf]

SUPPLEMENTARY ONLINE DATA

Fingerprinting of hydroxyl radical-attacked polysaccharides by *N*-isopropyl-2-aminoacridone labelling

Robert A. M. VREEBURG\*<sup>1</sup>, Othman B. AIRIANAH\*<sup>2</sup> and Stephen C. FRY\*<sup>3</sup>

\*The Edinburgh Cell Wall Group, Institute of Molecular Plant Sciences, School of Biological Sciences, Daniel Rutherford Building, The King's Buildings, Edinburgh EH9 3JH, U.K.

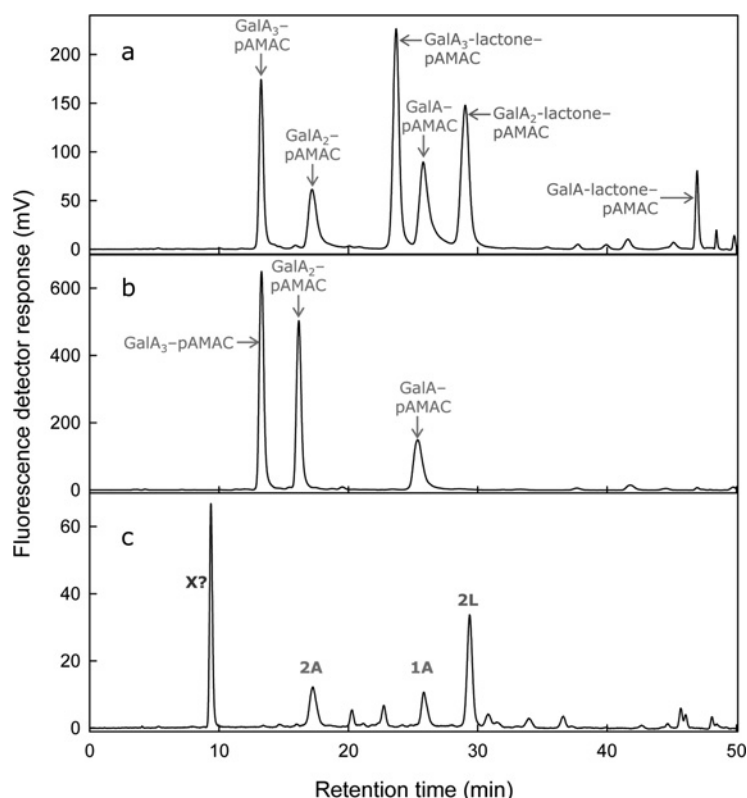

**Figure S1 HPLC of Driselase digestion products of pectin, pAMAC-labelled after •OH-attack, compared with UA-pAMAC conjugates**

(a) Mixture of GalA<sub>n</sub>-pAMAC conjugates similar to that in Figure 4(a) of the main text. (b) As in (a) but de-lactonized, showing only the free acids. (c) •OH-attacked pectin was pAMAC-labelled and Driselase-digested, and the fluorescent products were enriched by use of a C<sub>18</sub> cartridge. The mixture of products in the 20% methanol eluate (not de-lactonized) was then subjected to HPLC on a Luna C<sub>18</sub> column. Peaks in (c) are labelled 1A, 2A and 2L on the basis of the similarity of their HPLC retention times relative to those of reducing-end-labelled compounds that are identical (=) or have equivalent constitution (≡): 1A = GalA-pAMAC; 2A ≡ GalA<sub>2</sub>-pAMAC; 2L ≡ GalA<sub>2</sub>-lactone-pAMAC.

Received 29 May 2014/28 July 2014; accepted 29 July 2014  
 Published as BJ Immediate Publication 29 July 2014, doi:10.1042/BJ20140678

<sup>1</sup> Present address: NAK, P.O. Box 1115, 8300 BC Emmeloord, The Netherlands  
<sup>2</sup> Present address: School of Biosciences & Biotechnology, Faculty of Science & Technology, The National University of Malaysia, 43600 Bangi, Selangor, Malaysia.  
<sup>3</sup> To whom correspondence should be addressed (email S.Fry@ed.ac.uk).
